# Supplementary material
Source: HighWire-hosted journal article supplement (https://meilu.sanwago.com/content/suppl/2019/01/30/bmj.l42)

# GOfER diagram (Graphical Overview for Evidence Reviews)

Use this diagram to compare characteristics of the included studies and participants, evidence quality and findings

## ASSESSMENT OF EXPOSURE

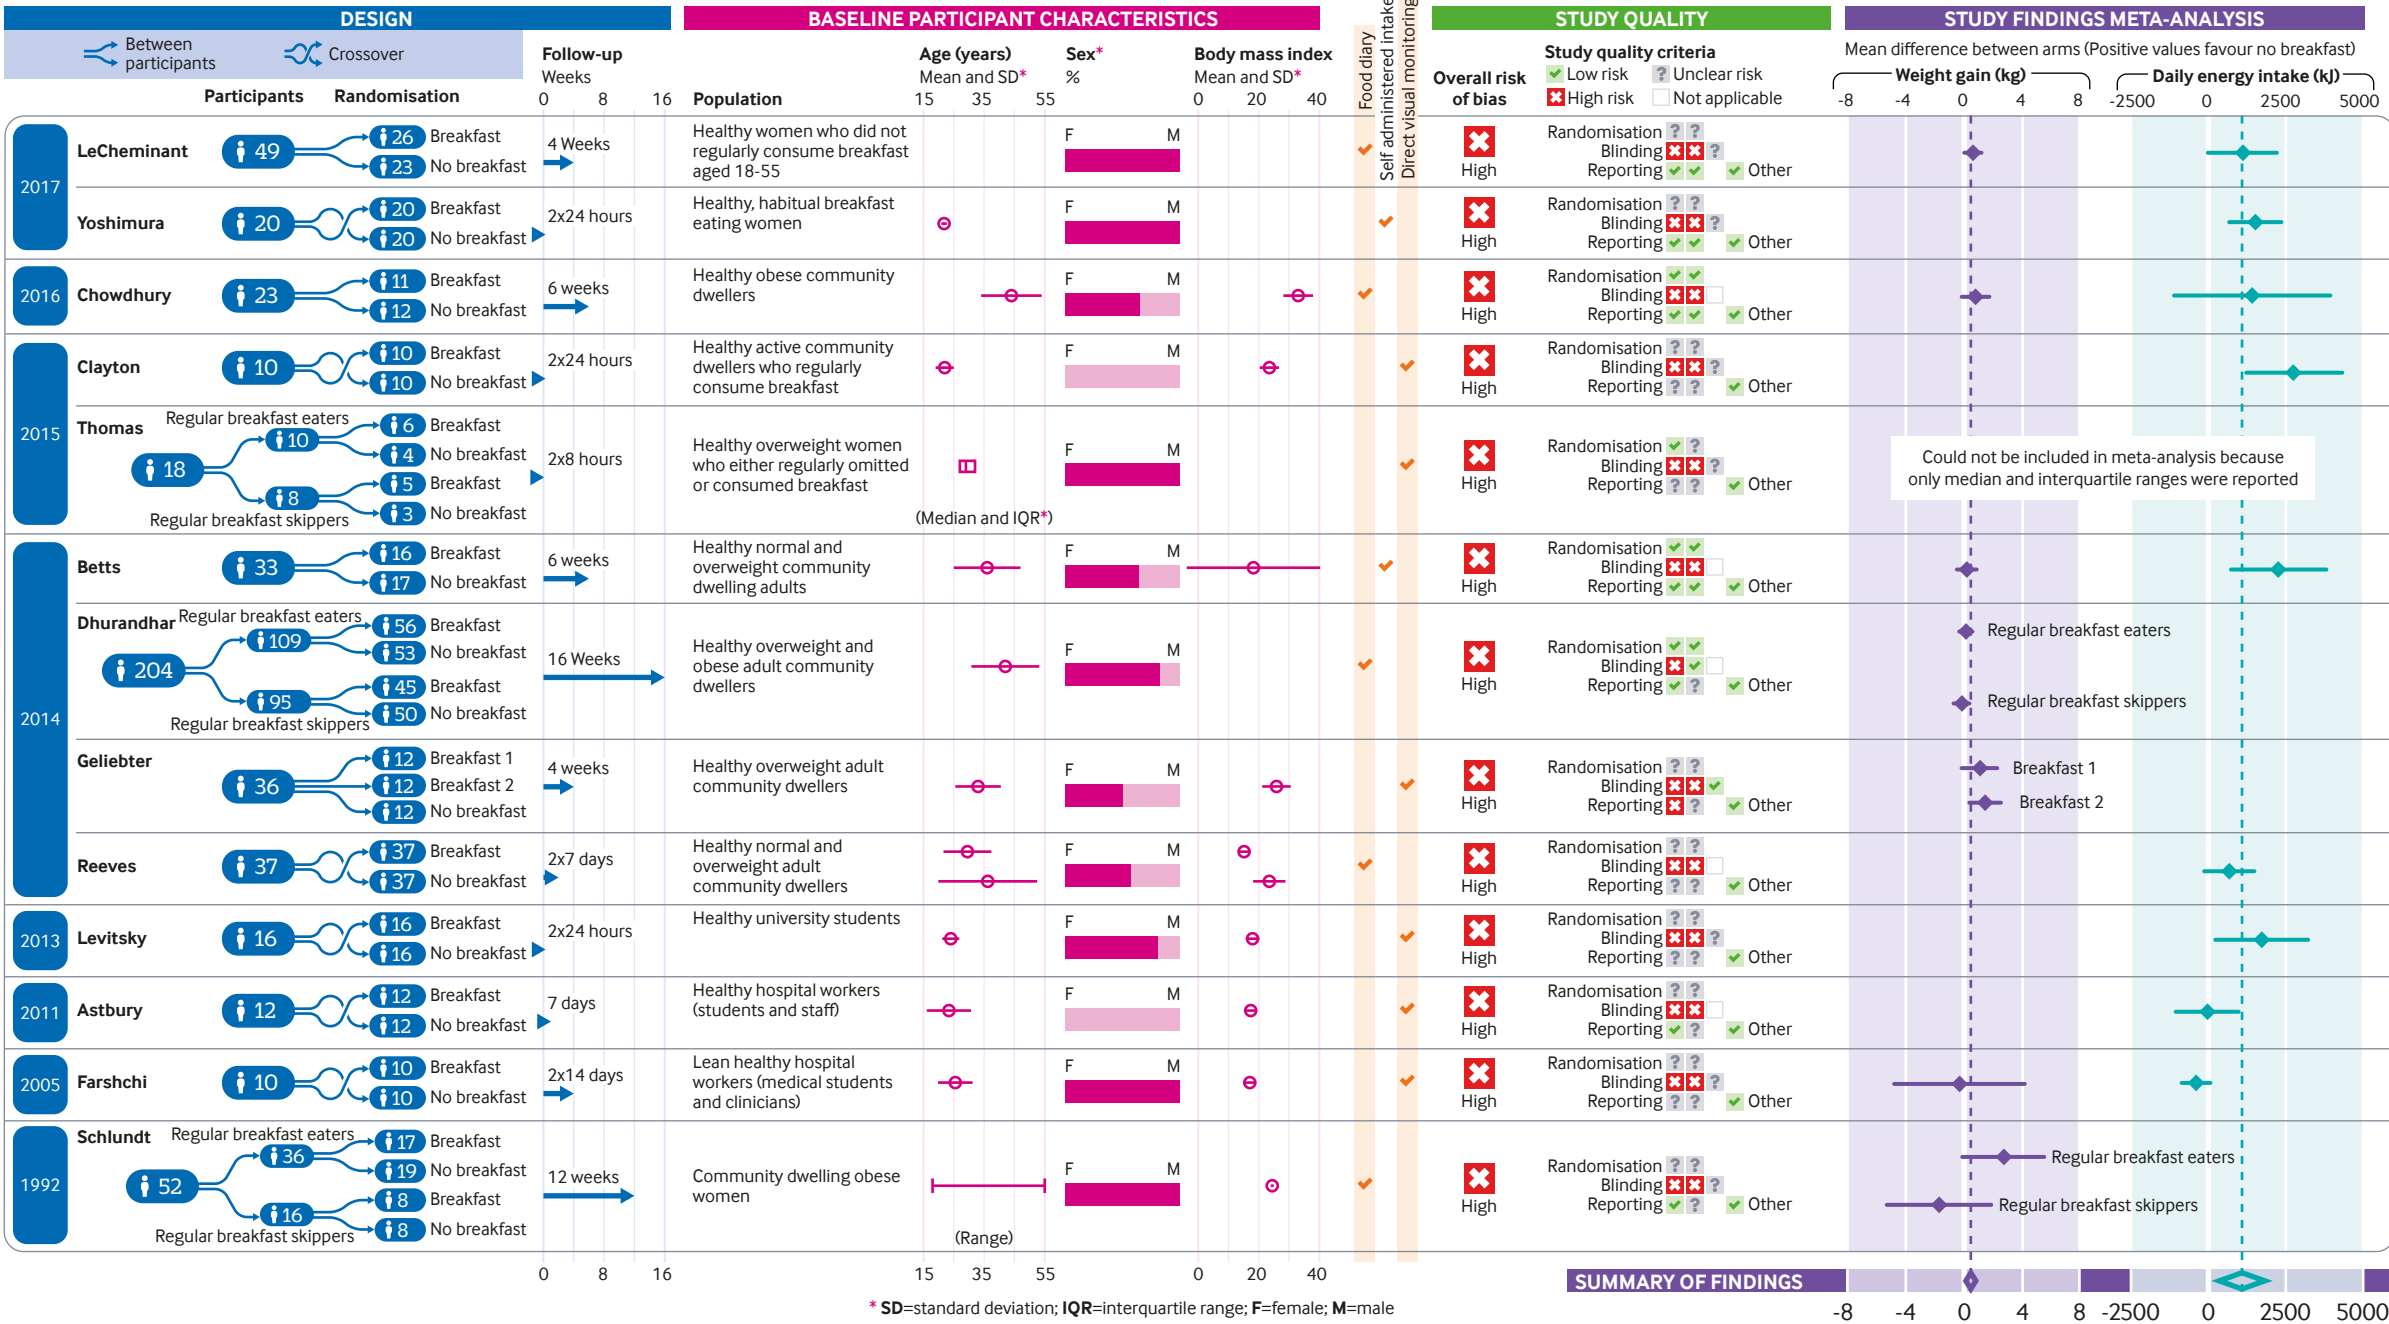

\*SD=standard deviation; IQR=interquartile range; F=female; M=male

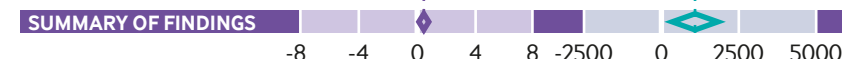

Supplement: siek045910.sf.pdf [file siek045910.sf.pdf]
